# Supplementary material
Source: Springer Nature journal article supplement (https://www.springermedizin.de/resource/supplementary/12885_2009_2049_MOESM3_ESM.pdf/9460394)

**A**

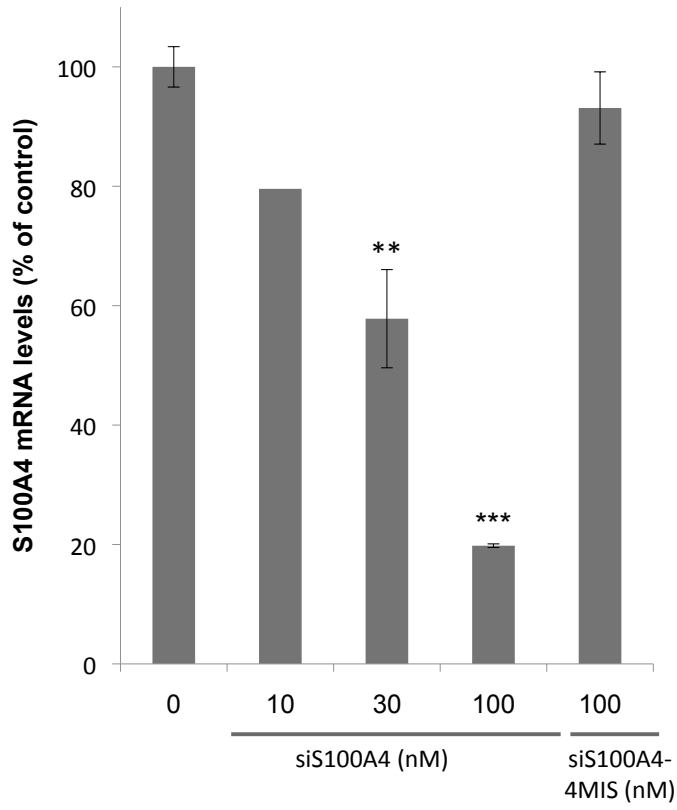

**B**

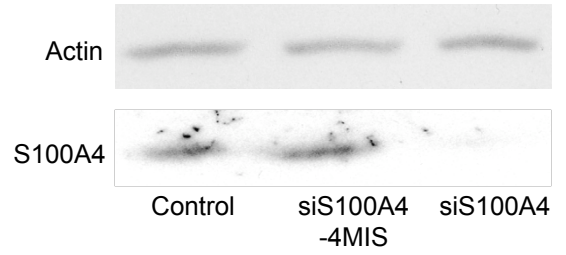

**C**

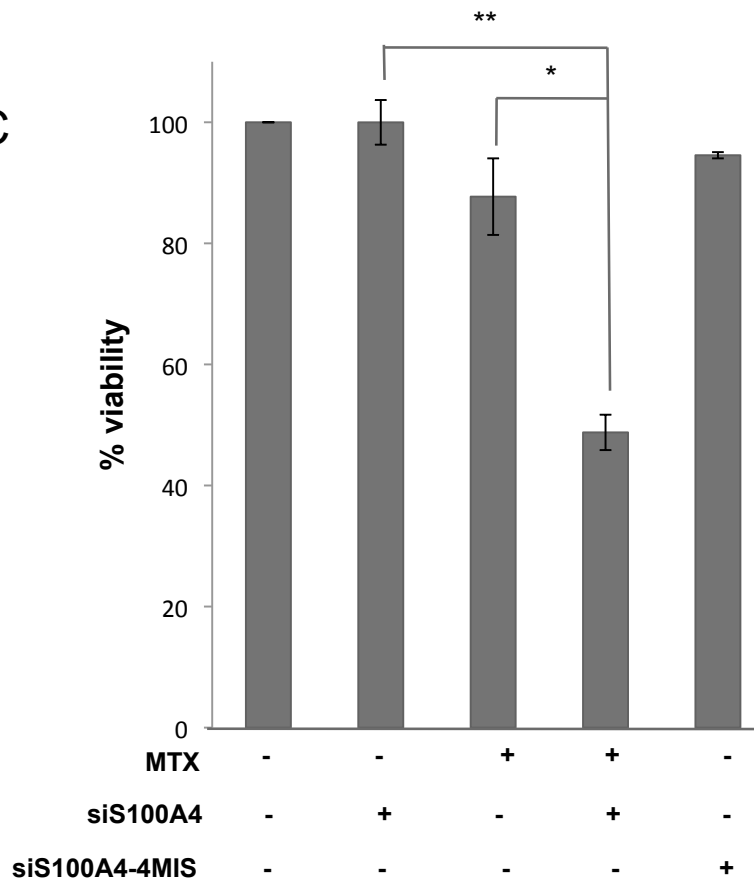

Supplement: MOESM3 [file 9460394]
